# Supplementary material for: Molecular Detection and Characterization of Blastocystis sp. and Enterocytozoon bieneusi in Cattle in Northern Spain
Source: MDPI journal article supplement (doi:10.3390/vetsci8090191), 2021-09-11
Supplement: s1 [file s1]

| Sample_id          | Sampling campaign | Sex     | Breed             | Sampling site     | Municipality | County           | Production system | <i>Blastocystis</i> ssu - PCR | Sanger sequencing |   |
|--------------------|-------------------|---------|-------------------|-------------------|--------------|------------------|-------------------|-------------------------------|-------------------|---|
| PTC + 25-1         | 1                 | Unknown | Unknown           | Unknown           | Unknown      | Unknown          | Unknown           | Negative                      | –                 | – |
| PTC + • 25-1       | 1                 | Unknown | Unknown           | Unknown           | Unknown      | Unknown          | Unknown           | Dubious                       | Untypable         | – |
| PTC 1 28-1         | 1                 | Unknown | Unknown           | Unknown           | Unknown      | Unknown          | Unknown           | Negative                      | –                 | – |
| PTC 2 28-1         | 1                 | Unknown | Unknown           | Unknown           | Unknown      | Unknown          | Unknown           | Dubious                       | Untypable         | – |
| PTC 3 28-1         | 1                 | Unknown | Unknown           | Unknown           | Unknown      | Unknown          | Unknown           | Negative                      | –                 | – |
| PTC 4 28-1         | 1                 | Unknown | Unknown           | Unknown           | Unknown      | Unknown          | Unknown           | Negative                      | –                 | – |
| PTC 5 28-1         | 1                 | Unknown | Unknown           | Unknown           | Unknown      | Unknown          | Unknown           | Negative                      | –                 | – |
| PTC 6 28-1         | 1                 | Unknown | Unknown           | Unknown           | Unknown      | Unknown          | Unknown           | Negative                      | –                 | – |
| PTC 7 28-1         | 1                 | Unknown | Unknown           | Unknown           | Unknown      | Unknown          | Unknown           | Negative                      | –                 | – |
| PTC 8 28-1         | 1                 | Unknown | Unknown           | Unknown           | Unknown      | Unknown          | Unknown           | Negative                      | –                 | – |
| PTC 9 28-1         | 1                 | Unknown | Unknown           | Unknown           | Unknown      | Unknown          | Unknown           | Dubious                       | Untypable         | – |
| PTC N 28-1         | 1                 | Unknown | Unknown           | Unknown           | Unknown      | Unknown          | Unknown           | Negative                      | –                 | – |
| PTC + 28-1         | 1                 | Unknown | Unknown           | Unknown           | Unknown      | Unknown          | Unknown           | Negative                      | –                 | – |
| PTC + 28 •         | 1                 | Unknown | Unknown           | Unknown           | Unknown      | Unknown          | Unknown           | Dubious                       | Untypable         | – |
| 18210215           | 1                 | Female  | Holstein-Friesian | Amurrio           | Lezama       | Ayala            | Dairy             | Negative                      | –                 | – |
| 18210216           | 1                 | Female  | Holstein-Friesian | Amurrio           | Lezama       | Ayala            | Dairy             | Negative                      | –                 | – |
| 18210217           | 1                 | Female  | Holstein-Friesian | Amurrio           | Lezama       | Ayala            | Dairy             | Negative                      | –                 | – |
| 18210218           | 1                 | Female  | Holstein-Friesian | Amurrio           | Lezama       | Ayala            | Dairy             | Negative                      | –                 | – |
| 18210219           | 1                 | Female  | Holstein-Friesian | Amurrio           | Lezama       | Ayala            | Dairy             | Negative                      | –                 | – |
| 18210220           | 1                 | Female  | Holstein-Friesian | Amurrio           | Lezama       | Ayala            | Dairy             | Negative                      | –                 | – |
| 191741             | 1                 | Unknown | Unknown           | Abadiño-Zelaleta  | Abadiño      | Ayala            | Unknown           | Negative                      | –                 | – |
| 191751             | 1                 | Female  | Pirenaica         | Tertanga          | Amurrio      | Ayala            | Beef              | Dubious                       | Untypable         | – |
| 191752             | 1                 | Female  | Pirenaica         | Tertanga          | Amurrio      | Ayala            | Beef              | Positive                      | ST10              | – |
| 191771             | 1                 | Female  | Limousin          | Zárate            | Zuia         | Zuia-Gorbeialdea | Beef              | Positive                      | ST5               | – |
| PTB1 29-10 18-1777 | 1                 | Female  | Holstein-Friesian | Llodio            | Llodio       | Ayala            | Dairy             | Dubious                       | Untypable         | – |
| PTB2 29-10 18-1777 | 1                 | Female  | Holstein-Friesian | Llodio            | Llodio       | Ayala            | Dairy             | Positive                      | ST5               | – |
| PTB+ 29-10 17-1284 | 1                 | Female  | Holstein-Friesian | Oleta             | Aramaio      | Zuia-Gorbeialdea | Dairy             | Negative                      | –                 | – |
| Parat1 26-11       | 1                 | Unknown | Unknown           | Unknown           | Unknown      | Unknown          | Unknown           | Negative                      | –                 | – |
| ParatN 26-11       | 1                 | Unknown | Unknown           | Unknown           | Unknown      | Unknown          | Unknown           | Negative                      | –                 | – |
| Parat+26-11        | 1                 | Unknown | Unknown           | Unknown           | Unknown      | Unknown          | Unknown           | Negative                      | –                 | – |
| Par118-12 18/2124  | 1                 | Female  | Terreña           | Guillarte         | Kuartango    | Añana            | Beef              | Positive                      | ST10              | – |
| Par2 18-12 18/2125 | 1                 | Female  | Pirenaica         | Uzkiano           | Urkabustaiz  | Zuia-Gorbeialdea | Beef              | Dubious                       | Untypable         | – |
| ParN 18-12 17/1237 | 1                 | Female  | Mixed breed       | Luiando           | Ayala        | Ayala            | Beef              | Negative                      | –                 | – |
| Parat+18-12        | 1                 | Unknown | Unknown           | Unknown           | Unknown      | Unknown          | Unknown           | Negative                      | –                 | – |
| PTC125-1           | 1                 | Unknown | Astur de montaña  | Guillarte         | Kuartango    | Añana            | Beef              | Negative                      | –                 | – |
| PTC225-1           | 1                 | Unknown | Unknown           | Unknown           | Unknown      | Unknown          | Unknown           | Negative                      | –                 | – |
| PTC325-1           | 1                 | Unknown | Unknown           | Unknown           | Unknown      | Unknown          | Unknown           | Negative                      | –                 | – |
| PTC425-1           | 1                 | Female  | Pirenaica         | Oiaro             | Urkabustaiz  | Zuia-Gorbeialdea | Beef              | Negative                      | –                 | – |
| PTC525-1           | 1                 | Unknown | Unknown           | Unknown           | Unknown      | Unknown          | Unknown           | Negative                      | –                 | – |
| PTC625-1           | 1                 | Unknown | Unknown           | Unknown           | Unknown      | Unknown          | Unknown           | Negative                      | –                 | – |
| PTCN25-1           | 1                 | Unknown | Unknown           | Unknown           | Unknown      | Unknown          | Unknown           | Negative                      | –                 | – |
| 171237N            | 1                 | Female  | BOER              | Luiando           | Ayala        | Ayala            | Unknown           | Negative                      | –                 | – |
| 17152830+1         | 1                 | Unknown | Unknown           | Unknown           | Unknown      | Unknown          | Unknown           | Dubious                       | Untypable         | – |
| 18210221           | 1                 | Female  | Holstein-Friesian | Lezama            | Amurrio      | Ayala            | Dairy             | Negative                      | –                 | – |
| 18210222           | 1                 | Female  | Holstein-Friesian | Lezama            | Amurrio      | Ayala            | Dairy             | Negative                      | –                 | – |
| 23                 | 1                 | Female  | Holstein-Friesian | Lezama            | Amurrio      | Ayala            | Dairy             | Negative                      | –                 | – |
| 24                 | 1                 | Female  | Holstein-Friesian | Lezama            | Amurrio      | Ayala            | Dairy             | Negative                      | –                 | – |
| 25                 | 1                 | Female  | Holstein-Friesian | Lezama            | Amurrio      | Ayala            | Dairy             | Negative                      | –                 | – |
| 26                 | 1                 | Female  | Holstein-Friesian | Lezama            | Amurrio      | Ayala            | Dairy             | Dubious                       | Untypable         | – |
| 27                 | 1                 | Female  | Holstein-Friesian | Lezama            | Amurrio      | Ayala            | Dairy             | Negative                      | –                 | – |
| 28                 | 1                 | Female  | Holstein-Friesian | Lezama            | Amurrio      | Ayala            | Dairy             | Negative                      | –                 | – |
| 29                 | 1                 | Female  | Holstein-Friesian | Lezama            | Amurrio      | Ayala            | Dairy             | Negative                      | –                 | – |
| 30                 | 1                 | Female  | Holstein-Friesian | Lezama            | Amurrio      | Ayala            | Dairy             | Dubious                       | Untypable         | – |
| 31                 | 1                 | Female  | Holstein-Friesian | Lezama            | Amurrio      | Ayala            | Dairy             | Negative                      | –                 | – |
| 32                 | 1                 | Female  | Holstein-Friesian | Lezama            | Amurrio      | Ayala            | Dairy             | Negative                      | –                 | – |
| 33                 | 1                 | Female  | Holstein-Friesian | Lezama            | Amurrio      | Ayala            | Dairy             | Negative                      | –                 | – |
| 34                 | 1                 | Female  | Holstein-Friesian | Lezama            | Amurrio      | Ayala            | Dairy             | Negative                      | –                 | – |
| 35                 | 1                 | Female  | Holstein-Friesian | Lezama            | Amurrio      | Ayala            | Dairy             | Negative                      | –                 | – |
| 36                 | 1                 | Female  | Holstein-Friesian | Lezama            | Amurrio      | Ayala            | Dairy             | Negative                      | –                 | – |
| 37                 | 1                 | Female  | Holstein-Friesian | Lezama            | Amurrio      | Ayala            | Dairy             | Negative                      | –                 | – |
| 38                 | 1                 | Female  | Holstein-Friesian | Lezama            | Amurrio      | Ayala            | Dairy             | Dubious                       | Untypable         | – |
| 39                 | 1                 | Female  | Holstein-Friesian | Lezama            | Amurrio      | Ayala            | Dairy             | Positive                      | ST10              | – |
| 18210240           | 1                 | Female  | Holstein-Friesian | Lezama            | Amurrio      | Ayala            | Dairy             | Dubious                       | Untypable         | – |
| PTC17/1237N 31-1   | 1                 | Female  | BOER              | Luiando           | Ayala        | Ayala            | Unknown           | Negative                      | –                 | – |
| PTC+18/1528 31-1   | 1                 | Female  | Astur de montaña  | Subijana-Morillas | Ribera alta  | Añana            | Beef              | Dubious                       | Untypable         | – |
| 18210241           | 1                 | Female  | Holstein-Friesian | Lezama            | Amurrio      | Ayala            | Dairy             | Dubious                       | Untypable         | – |
| 18210242           | 1                 | Female  | Holstein-Friesian | Lezama            | Amurrio      | Ayala            | Dairy             | Dubious                       | Untypable         | – |
| 18210243           | 1                 | Female  | Holstein-Friesian | Lezama            | Amurrio      | Ayala            | Dairy             | Dubious                       | Untypable         | – |
| 18210244           | 1                 | Female  | Holstein-Friesian | Lezama            | Amurrio      | Ayala            | Dairy             | Positive                      | ST10              | – |
| 18210245           | 1                 | Female  | Holstein-Friesian | Lezama            | Amurrio      | Ayala            | Dairy             | Dubious                       | Untypable         | – |
| 18210246           | 1                 | Female  | Holstein-Friesian | Lezama            | Amurrio      | Ayala            | Dairy             | Dubious                       | Untypable         | – |
| 18210247           | 1                 | Female  | Holstein-Friesian | Lezama            | Amurrio      | Ayala            | Dairy             | Negative                      | –                 | – |
| 18210248           | 1                 | Female  | Holstein-Friesian | Lezama            | Amurrio      | Ayala            | Dairy             | Dubious                       | Untypable         | – |
| 18210249           | 1                 | Female  | Holstein-Friesian | Lezama            | Amurrio      | Ayala            | Dairy             | Dubious                       | Untypable         | – |
| 18210250           | 1                 | Female  | Holstein-Friesian | Lezama            | Amurrio      | Ayala            | Dairy             | Negative                      | –                 | – |
| 18210251           | 1                 | Female  | Holstein-Friesian | Lezama            | Amurrio      | Ayala            | Dairy             | Negative                      | –                 | – |
| 18210252           | 1                 | Female  | Holstein-Friesian | Lezama            | Amurrio      | Ayala            | Dairy             | Negative                      | –                 | – |
| 18210253           | 1                 | Female  | Holstein-Friesian | Lezama            | Amurrio      | Ayala            | Dairy             | Negative                      | –                 | – |
| 18210254           | 1                 | Female  | Holstein-Friesian | Lezama            | Amurrio      | Ayala            | Dairy             | Negative                      | –                 | – |
| 18210255           | 1                 | Female  | Holstein-Friesian | Lezama            | Amurrio      | Ayala            | Dairy             | Negative                      | –                 | – |
| 18210256           | 1                 | Female  | Holstein-Friesian | Lezama            | Amurrio      | Ayala            | Dairy             | Negative                      | –                 | – |
| 18210257           | 1                 | Female  | Holstein-Friesian | Lezama            | Amurrio      | Ayala            | Dairy             | Negative                      | –                 | – |
| 18210258           | 1                 | Female  | Holstein-Friesian | Lezama            | Amurrio      | Ayala            | Dairy             | Negative                      | –                 | – |

|           |   |         |                   |                   |             |                  |         |          |           |     |
|-----------|---|---------|-------------------|-------------------|-------------|------------------|---------|----------|-----------|-----|
| 18210259  | 1 | Female  | Holstein-Friesian | Lezama            | Amurrio     | Ayala            | Dairy   | Negative | -         | -   |
| 18210260  | 1 | Female  | Holstein-Friesian | Lezama            | Amurrio     | Ayala            | Dairy   | Negative | -         | -   |
| 61        | 1 | Female  | Holstein-Friesian | Lezama            | Amurrio     | Ayala            | Dairy   | Negative | -         | -   |
| 62        | 1 | Female  | Holstein-Friesian | Lezama            | Amurrio     | Ayala            | Dairy   | Negative | -         | -   |
| 63        | 1 | Female  | Holstein-Friesian | Lezama            | Amurrio     | Ayala            | Dairy   | Negative | -         | -   |
| 64        | 1 | Female  | Holstein-Friesian | Lezama            | Amurrio     | Ayala            | Dairy   | Negative | -         | -   |
| 65        | 1 | Female  | Holstein-Friesian | Lezama            | Amurrio     | Ayala            | Dairy   | Negative | -         | -   |
| 18210276  | 1 | Female  | Holstein-Friesian | Lezama            | Amurrio     | Ayala            | Dairy   | Positive | ST10      | -   |
| 66        | 1 | Female  | Holstein-Friesian | Lezama            | Amurrio     | Ayala            | Dairy   | Negative | -         | -   |
| 67        | 1 | Female  | Holstein-Friesian | Lezama            | Amurrio     | Ayala            | Dairy   | Negative | -         | -   |
| 68        | 1 | Female  | Holstein-Friesian | Lezama            | Amurrio     | Ayala            | Dairy   | Negative | -         | -   |
| 69        | 1 | Female  | Holstein-Friesian | Lezama            | Amurrio     | Ayala            | Dairy   | Negative | -         | -   |
| 70        | 1 | Female  | Holstein-Friesian | Lezama            | Amurrio     | Ayala            | Dairy   | Negative | -         | -   |
| 71        | 1 | Female  | Holstein-Friesian | Lezama            | Amurrio     | Ayala            | Dairy   | Negative | -         | -   |
| 72        | 1 | Female  | Holstein-Friesian | Lezama            | Amurrio     | Ayala            | Dairy   | Negative | -         | -   |
| 73        | 1 | Female  | Holstein-Friesian | Lezama            | Amurrio     | Ayala            | Dairy   | Negative | -         | -   |
| 74        | 1 | Female  | Holstein-Friesian | Lezama            | Amurrio     | Ayala            | Dairy   | Negative | -         | -   |
| 75        | 1 | Female  | Holstein-Friesian | Lezama            | Amurrio     | Ayala            | Dairy   | Negative | -         | -   |
| 192131    | 1 | Female  | Pirenaica         | Arexola           | Aramaio     | Zuia-Gorbeialdea | Beef    | Negative | -         | -   |
| 192132    | 1 | Female  | Pirenaica         | Arexola           | Aramaio     | Zuia-Gorbeialdea | Beef    | Positive | ST10      | -   |
| 191901    | 1 | Female  | Mixed breed       | Aperregi          | Zuia        | Zuia-Gorbeialdea | Beef    | Positive | ST10      | -   |
| 191902    | 1 | Female  | Mixed breed       | Aperregi          | Zuia        | Zuia-Gorbeialdea | Beef    | Positive | ST5       | -   |
| 192541    | 1 | Female  | Astur de montaña  | Subijana-Morillas | Ribera alta | Añana            | Beef    | Dubious  | Untypable | -   |
| 192542    | 1 | Female  | Astur de montaña  | Subijana-Morillas | Ribera alta | Añana            | Beef    | Positive | ST5       | -   |
| 192543    | 1 | Female  | Astur de montaña  | Subijana-Morillas | Ribera alta | Añana            | Beef    | Positive | ST5       | -   |
| 192591    | 1 | Female  | Pirenaica         | Abezia            | Urkabuztaiz | Zuia-Gorbeialdea | Beef    | Dubious  | Untypable | -   |
| 192741    | 1 | Female  | Salers            | Ozaeta            | Barrundia   | Llanada Alavesa  | Beef    | Positive | ST10      | -   |
| 192751    | 1 | Female  | Astur de montaña  | Subijana-Morillas | Ribera alta | Añana            | Beef    | Dubious  | Untypable | -   |
| PTCN12-2  | 1 | Unknown | Unknown           | Unknown           | Unknown     | Unknown          | Unknown | Negative | -         | -   |
| PTC+12-2  | 1 | Unknown | Unknown           | Unknown           | Unknown     | Unknown          | Unknown | Dubious  | Untypable | -   |
| PTC119387 | 1 | Female  | Pirenaica         | Oiardo            | Urkabuztaiz | Zuia-Gorbeialdea | Beef    | Negative | -         | -   |
| 219387    | 1 | Female  | Pirenaica         | Oiardo            | Urkabuztaiz | Zuia-Gorbeialdea | Beef    | Dubious  | Untypable | -   |
| 319387    | 1 | Female  | Pirenaica         | Oiardo            | Urkabuztaiz | Zuia-Gorbeialdea | Beef    | Dubious  | Untypable | -   |
| 419387    | 1 | Female  | Pirenaica         | Oiardo            | Urkabuztaiz | Zuia-Gorbeialdea | Beef    | Dubious  | Untypable | -   |
| PTC113-3  | 1 | Unknown | Unknown           | Unknown           | Unknown     | Unknown          | Unknown | Dubious  | Untypable | -   |
| PTC213-3  | 1 | Unknown | Unknown           | Unknown           | Unknown     | Unknown          | Unknown | Positive | ST5       | -   |
| PTC313-3  | 1 | Unknown | Unknown           | Unknown           | Unknown     | Unknown          | Unknown | Positive | ST10      | -   |
| PTC14-4   | 1 | Unknown | Unknown           | Unknown           | Unknown     | Unknown          | Unknown | Negative | -         | -   |
| PTC24-4   | 1 | Unknown | Unknown           | Unknown           | Unknown     | Unknown          | Unknown | Negative | -         | -   |
| PTC34-4   | 1 | Unknown | Unknown           | Unknown           | Unknown     | Unknown          | Unknown | Dubious  | Untypable | -   |
| PTC44-4   | 1 | Unknown | Unknown           | Unknown           | Unknown     | Unknown          | Unknown | Dubious  | Untypable | -   |
| PTC54-4   | 1 | Unknown | Unknown           | Unknown           | Unknown     | Unknown          | Unknown | Negative | -         | -   |
| PTC64-4   | 1 | Unknown | Unknown           | Unknown           | Unknown     | Unknown          | Unknown | Dubious  | Untypable | -   |
| PTC74-4   | 1 | Unknown | Unknown           | Unknown           | Unknown     | Unknown          | Unknown | Dubious  | Untypable | -   |
| PTC84-4   | 1 | Unknown | Unknown           | Unknown           | Unknown     | Unknown          | Unknown | Dubious  | Untypable | -   |
| PTC121-3  | 1 | Unknown | Unknown           | Unknown           | Unknown     | Unknown          | Unknown | Dubious  | Untypable | -   |
| PTC221-3  | 1 | Unknown | Unknown           | Unknown           | Unknown     | Unknown          | Unknown | Positive | ST5       | -   |
| PTC321-3  | 1 | Unknown | Unknown           | Unknown           | Unknown     | Unknown          | Unknown | Negative | -         | -   |
| PTC421-3  | 1 | Unknown | Unknown           | Unknown           | Unknown     | Unknown          | Unknown | Negative | -         | -   |
| PTC521-3  | 1 | Unknown | Unknown           | Unknown           | Unknown     | Unknown          | Unknown | Negative | -         | -   |
| PTC621-3  | 1 | Unknown | Unknown           | Unknown           | Unknown     | Unknown          | Unknown | Negative | -         | -   |
| PTC721-3  | 1 | Unknown | Unknown           | Unknown           | Unknown     | Unknown          | Unknown | Negative | -         | -   |
| PTC821-3  | 1 | Unknown | Unknown           | Unknown           | Unknown     | Unknown          | Unknown | Negative | -         | -   |
| PTC921-3  | 1 | Unknown | Unknown           | Unknown           | Unknown     | Unknown          | Unknown | Negative | -         | -   |
| PTC1021-3 | 1 | Unknown | Unknown           | Unknown           | Unknown     | Unknown          | Unknown | Negative | -         | -   |
| PTC1121-3 | 1 | Unknown | Unknown           | Unknown           | Unknown     | Unknown          | Unknown | Negative | -         | -   |
| PTC1221-3 | 1 | Unknown | Unknown           | Unknown           | Unknown     | Unknown          | Unknown | Negative | -         | -   |
| PTC1321-3 | 1 | Unknown | Unknown           | Unknown           | Unknown     | Unknown          | Unknown | Positive | ST5       | -   |
| PTC1421-3 | 1 | Unknown | Unknown           | Unknown           | Unknown     | Unknown          | Unknown | Negative | -         | -   |
| PTC115-4  | 1 | Unknown | Unknown           | Unknown           | Unknown     | Unknown          | Unknown | Negative | -         | -   |
| PTC215-4  | 1 | Unknown | Unknown           | Unknown           | Unknown     | Unknown          | Unknown | Dubious  | Untypable | -   |
| PTC315-4  | 1 | Unknown | Unknown           | Unknown           | Unknown     | Unknown          | Unknown | Dubious  | Untypable | -   |
| PTC415-4  | 1 | Unknown | Unknown           | Unknown           | Unknown     | Unknown          | Unknown | Positive | ST10      | -   |
| PTC515-4  | 1 | Unknown | Unknown           | Unknown           | Unknown     | Unknown          | Unknown | Positive | ST10      | -   |
| PTC615-4  | 1 | Unknown | Unknown           | Unknown           | Unknown     | Unknown          | Unknown | Dubious  | Untypable | -   |
| PTC715-4  | 1 | Unknown | Unknown           | Unknown           | Unknown     | Unknown          | Unknown | Dubious  | Untypable | -   |
| PTC815-4  | 1 | Unknown | Unknown           | Unknown           | Unknown     | Unknown          | Unknown | Negative | -         | -   |
| PTC915-4  | 1 | Unknown | Unknown           | Unknown           | Unknown     | Unknown          | Unknown | Dubious  | Untypable | -   |
| PTC1015-4 | 1 | Unknown | Unknown           | Unknown           | Unknown     | Unknown          | Unknown | Positive | ST10      | -   |
| PTC1115-4 | 1 | Unknown | Unknown           | Unknown           | Unknown     | Unknown          | Unknown | Dubious  | Untypable | -   |
| PTC1215-4 | 1 | Unknown | Unknown           | Unknown           | Unknown     | Unknown          | Unknown | Negative | -         | -   |
| PTC1315-4 | 1 | Unknown | Unknown           | Unknown           | Unknown     | Unknown          | Unknown | Dubious  | Untypable | -   |
| PTC1415-4 | 1 | Unknown | Unknown           | Unknown           | Unknown     | Unknown          | Unknown | Dubious  | Untypable | -   |
| PTC1515-4 | 1 | Unknown | Unknown           | Unknown           | Unknown     | Unknown          | Unknown | Dubious  | Untypable | -   |
| PTC1615-4 | 1 | Unknown | Unknown           | Unknown           | Unknown     | Unknown          | Unknown | Dubious  | Untypable | ST3 |
| PTC1715-4 | 1 | Unknown | Unknown           | Unknown           | Unknown     | Unknown          | Unknown | Positive | ST5       | -   |
| PTC1815-4 | 1 | Unknown | Unknown           | Unknown           | Unknown     | Unknown          | Unknown | Positive | ST5       | -   |
| PTC18-5   | 1 | Unknown | Unknown           | Unknown           | Unknown     | Unknown          | Unknown | Negative | -         | -   |
| PTC28-5   | 1 | Unknown | Unknown           | Unknown           | Unknown     | Unknown          | Unknown | Positive | ST14      | -   |
| PTC38-5   | 1 | Unknown | Unknown           | Unknown           | Unknown     | Unknown          | Unknown | Positive | ST10      | -   |
| PTC48-5   | 1 | Unknown | Unknown           | Unknown           | Unknown     | Unknown          | Unknown | Positive | ST5       | -   |
| PTC58-5   | 1 | Unknown | Unknown           | Unknown           | Unknown     | Unknown          | Unknown | Negative | -         | -   |
| PTC68-5   | 1 | Unknown | Unknown           | Unknown           | Unknown     | Unknown          | Unknown | Dubious  | Untypable | -   |
| PTC78-5   | 1 | Unknown | Unknown           | Unknown           | Unknown     | Unknown          | Unknown | Dubious  | Untypable | -   |
| PTC88-5   | 1 | Unknown | Unknown           | Unknown           | Unknown     | Unknown          | Unknown | Negative | -         | -   |

|                  |   |         |                   |           |              |                  |         |          |           |   |
|------------------|---|---------|-------------------|-----------|--------------|------------------|---------|----------|-----------|---|
| PTC98-5          | 1 | Unknown | Unknown           | Unknown   | Unknown      | Unknown          | Unknown | Negative | -         | - |
| PTC108-5         | 1 | Unknown | Unknown           | Unknown   | Unknown      | Unknown          | Unknown | Positive | ST10      | - |
| PTC118-5         | 1 | Unknown | Unknown           | Unknown   | Unknown      | Unknown          | Unknown | Positive | ST10      | - |
| PTC128-5         | 1 | Unknown | Unknown           | Unknown   | Unknown      | Unknown          | Unknown | Dubious  | Untypable | - |
| PTC138-5         | 1 | Unknown | Unknown           | Unknown   | Unknown      | Unknown          | Unknown | Dubious  | Untypable | - |
| PTC148-5         | 1 | Unknown | Unknown           | Unknown   | Unknown      | Unknown          | Unknown | Dubious  | Untypable | - |
| PTC158-5         | 1 | Unknown | Unknown           | Unknown   | Unknown      | Unknown          | Unknown | Positive | ST5       | - |
| PTBC116-5        | 1 | Unknown | Unknown           | Unknown   | Unknown      | Unknown          | Unknown | Negative | -         | - |
| PTBC216-5        | 1 | Unknown | Unknown           | Unknown   | Unknown      | Unknown          | Unknown | Dubious  | Untypable | - |
| PTBC316-5        | 1 | Unknown | Unknown           | Unknown   | Unknown      | Unknown          | Unknown | Dubious  | Untypable | - |
| PTBC4            | 1 | Unknown | Unknown           | Unknown   | Unknown      | Unknown          | Unknown | Dubious  | Untypable | - |
| PTB 1            | 1 | Unknown | Unknown           | Unknown   | Unknown      | Unknown          | Unknown | Negative | -         | - |
| PTB 3            | 1 | Unknown | Unknown           | Unknown   | Unknown      | Unknown          | Unknown | Negative | -         | - |
| PTB 19/1726 23.7 | 1 | Unknown | Unknown           | Unknown   | Unknown      | Unknown          | Unknown | Negative | -         | - |
| PTB 19/1727 23.7 | 1 | Unknown | Unknown           | Unknown   | Unknown      | Unknown          | Unknown | Negative | -         | - |
| PTB 19/1728 23.7 | 1 | Unknown | Unknown           | Unknown   | Unknown      | Unknown          | Unknown | Negative | -         | - |
| PTB 19/1729 23.7 | 1 | Unknown | Unknown           | Unknown   | Unknown      | Unknown          | Unknown | Negative | -         | - |
| PTB 19/1730 23.7 | 1 | Unknown | Unknown           | Unknown   | Unknown      | Unknown          | Unknown | Negative | -         | - |
| PTB 19/1686 1    | 1 | Female  | Holstein-Friesian | Ollabarre | Iruña de Oca | Añana            | Dairy   | Negative | -         | - |
| PTB 19/1707 1    | 1 | Female  | Holstein-Friesian | Uzkiano   | Urkabuztaiz  | Zuia-Gorbeialdea | Dairy   | Negative | -         | - |
| PTB 19/1707 2    | 1 | Female  | Holstein-Friesian | Uzkiano   | Urkabuztaiz  | Zuia-Gorbeialdea | Dairy   | Positive | ST5       | - |
| PTB 19/1707 5    | 1 | Female  | Holstein-Friesian | Uzkiano   | Urkabuztaiz  | Zuia-Gorbeialdea | Dairy   | Positive | ST10      | - |
| PTB 19/1707 7    | 1 | Female  | Holstein-Friesian | Uzkiano   | Urkabuztaiz  | Zuia-Gorbeialdea | Dairy   | Positive | ST5       | - |
| PTB 1 29.10      | 1 | Unknown | Unknown           | Unknown   | Unknown      | Unknown          | Unknown | Negative | -         | - |
| PTB 2 29.10      | 1 | Unknown | Unknown           | Unknown   | Unknown      | Unknown          | Unknown | Positive | ST5       | - |
| PTB 3 29.10      | 1 | Unknown | Unknown           | Unknown   | Unknown      | Unknown          | Unknown | Dubious  | Untypable | - |
| PTB 4 29.10      | 1 | Unknown | Unknown           | Unknown   | Unknown      | Unknown          | Unknown | Negative | -         | - |
| PTB 5 29.10      | 1 | Unknown | Unknown           | Unknown   | Unknown      | Unknown          | Unknown | Positive | ST5       | - |
| PTB 19/1707 1    | 1 | Female  | Holstein-Friesian | Uzkiano   | Urkabuztaiz  | Zuia-Gorbeialdea | Dairy   | Negative | -         | - |
| PTB 19/1707 2    | 1 | Female  | Holstein-Friesian | Uzkiano   | Urkabuztaiz  | Zuia-Gorbeialdea | Dairy   | Negative | -         | - |
| PTB 19/1707 3    | 1 | Female  | Holstein-Friesian | Uzkiano   | Urkabuztaiz  | Zuia-Gorbeialdea | Dairy   | Positive | ST10      | - |
| PTB 19/1707 4    | 1 | Female  | Holstein-Friesian | Uzkiano   | Urkabuztaiz  | Zuia-Gorbeialdea | Dairy   | Negative | -         | - |
| PTB 19/1707 5    | 1 | Female  | Holstein-Friesian | Uzkiano   | Urkabuztaiz  | Zuia-Gorbeialdea | Dairy   | Positive | ST10      | - |
| PTB 19/1707 6    | 1 | Female  | Holstein-Friesian | Uzkiano   | Urkabuztaiz  | Zuia-Gorbeialdea | Dairy   | Dubious  | Untypable | - |
| PTB 19/1707 7    | 1 | Female  | Holstein-Friesian | Uzkiano   | Urkabuztaiz  | Zuia-Gorbeialdea | Dairy   | Positive | ST5       | - |
| 1871_1           | 1 | Female  | Holstein-Friesian | Lezama    | Amurrio      | Ayala            | Dairy   | Negative | -         | - |
| 1871_2           | 1 | Female  | Holstein-Friesian | Lezama    | Amurrio      | Ayala            | Dairy   | Negative | -         | - |
| 1871_3           | 1 | Female  | Holstein-Friesian | Lezama    | Amurrio      | Ayala            | Dairy   | Negative | -         | - |
| 1871_4           | 1 | Female  | Holstein-Friesian | Lezama    | Amurrio      | Ayala            | Dairy   | Negative | -         | - |
| 1871_5           | 1 | Female  | Holstein-Friesian | Lezama    | Amurrio      | Ayala            | Dairy   | Negative | -         | - |
| 1871_6           | 1 | Female  | Holstein-Friesian | Lezama    | Amurrio      | Ayala            | Dairy   | Negative | -         | - |
| 1871_7           | 1 | Female  | Holstein-Friesian | Lezama    | Amurrio      | Ayala            | Dairy   | Negative | -         | - |
| 1871_8           | 1 | Female  | Holstein-Friesian | Lezama    | Amurrio      | Ayala            | Dairy   | Negative | -         | - |
| 1871_9           | 1 | Female  | Holstein-Friesian | Lezama    | Amurrio      | Ayala            | Dairy   | Negative | -         | - |
| 1895_1           | 1 | Female  | Holstein-Friesian | Lukiano   | Zuia         | Zuia-Gorbeialdea | Dairy   | Negative | -         | - |
| 1895_2           | 1 | Female  | Holstein-Friesian | Lukiano   | Zuia         | Zuia-Gorbeialdea | Dairy   | Negative | -         | - |
| 1895_3           | 1 | Female  | Holstein-Friesian | Lukiano   | Zuia         | Zuia-Gorbeialdea | Dairy   | Negative | -         | - |
| 1895_4           | 1 | Female  | Holstein-Friesian | Lukiano   | Zuia         | Zuia-Gorbeialdea | Dairy   | Negative | -         | - |
| 1895_5           | 1 | Female  | Holstein-Friesian | Lukiano   | Zuia         | Zuia-Gorbeialdea | Dairy   | Negative | -         | - |
| 1895_6           | 1 | Female  | Holstein-Friesian | Lukiano   | Zuia         | Zuia-Gorbeialdea | Dairy   | Negative | -         | - |
| 1895_7           | 1 | Female  | Holstein-Friesian | Lukiano   | Zuia         | Zuia-Gorbeialdea | Dairy   | Negative | -         | - |
| 1895_8           | 1 | Female  | Holstein-Friesian | Lukiano   | Zuia         | Zuia-Gorbeialdea | Dairy   | Negative | -         | - |
| 1895_9           | 1 | Female  | Holstein-Friesian | Lukiano   | Zuia         | Zuia-Gorbeialdea | Dairy   | Negative | -         | - |
| 1895_10          | 1 | Female  | Holstein-Friesian | Lukiano   | Zuia         | Zuia-Gorbeialdea | Dairy   | Negative | -         | - |
| 1895_11          | 1 | Female  | Holstein-Friesian | Lukiano   | Zuia         | Zuia-Gorbeialdea | Dairy   | Negative | -         | - |
| 1895_12          | 1 | Female  | Holstein-Friesian | Lukiano   | Zuia         | Zuia-Gorbeialdea | Dairy   | Negative | -         | - |
| 1895_13          | 1 | Female  | Holstein-Friesian | Lukiano   | Zuia         | Zuia-Gorbeialdea | Dairy   | Negative | -         | - |
| 1895_14          | 1 | Female  | Holstein-Friesian | Lukiano   | Zuia         | Zuia-Gorbeialdea | Dairy   | Negative | -         | - |
| 20-1009/1        | 2 | Male    | Pirenaica         | Sojo      | Ayala        | Ayala            | Beef    | Negative | -         | - |
| 20-1009/2        | 2 | Female  | Mixed breed       | Sojo      | Ayala        | Ayala            | Beef    | Negative | -         | - |
| 20-1009/3        | 2 | Female  | Pirenaica         | Sojo      | Ayala        | Ayala            | Beef    | Negative | -         | - |
| 20-1009/4        | 2 | Female  | Limousin          | Sojo      | Ayala        | Ayala            | Beef    | Negative | -         | - |
| 20-1009/5        | 2 | Female  | Pirenaica         | Sojo      | Ayala        | Ayala            | Beef    | Negative | -         | - |
| 20-1009/6        | 2 | Female  | Pirenaica         | Sojo      | Ayala        | Ayala            | Beef    | Negative | -         | - |
| 20-1015/1        | 2 | Female  | Holstein-Friesian | Goian     | Legutio      | Zuia-Gorbeialdea | Dairy   | Negative | -         | - |
| 20-1026/1        | 2 | Female  | Limousin          | Goiuri    | Urkabuztaiz  | Zuia-Gorbeialdea | Beef    | Negative | -         | - |
| 20-1026/2        | 2 | Female  | Limousin          | Goiuri    | Urkabuztaiz  | Zuia-Gorbeialdea | Beef    | Negative | -         | - |
| 20-1026/3        | 2 | Female  | Limousin          | Goiuri    | Urkabuztaiz  | Zuia-Gorbeialdea | Beef    | Negative | -         | - |
| 20-1026/4        | 2 | Female  | Limousin          | Goiuri    | Urkabuztaiz  | Zuia-Gorbeialdea | Beef    | Negative | -         | - |
| 20-1026/5        | 2 | Female  | Limousin          | Goiuri    | Urkabuztaiz  | Zuia-Gorbeialdea | Beef    | Negative | -         | - |
| 20-1026/6        | 2 | Female  | Limousin          | Goiuri    | Urkabuztaiz  | Zuia-Gorbeialdea | Beef    | Negative | -         | - |
| 20-1026/7        | 2 | Female  | Limousin          | Goiuri    | Urkabuztaiz  | Zuia-Gorbeialdea | Beef    | Negative | -         | - |
| 20-1026/8        | 2 | Female  | Limousin          | Goiuri    | Urkabuztaiz  | Zuia-Gorbeialdea | Beef    | Negative | -         | - |
| 20-1026/31       | 2 | Female  | Limousin          | Goiuri    | Urkabuztaiz  | Zuia-Gorbeialdea | Beef    | Negative | -         | - |
| 20-1004-1        | 2 | Female  | Holstein-Friesian | Oiarδο    | Urkabuztaiz  | Zuia-Gorbeialdea | Dairy   | Dubious  | Untypable | - |
| 20-1004-2        | 2 | Female  | Holstein-Friesian | Oiarδο    | Urkabuztaiz  | Zuia-Gorbeialdea | Dairy   | Dubious  | Untypable | - |
| 20-1004-3        | 2 | Female  | Holstein-Friesian | Oiarδο    | Urkabuztaiz  | Zuia-Gorbeialdea | Dairy   | Dubious  | Untypable | - |
| 20-1004-4        | 2 | Female  | Holstein-Friesian | Oiarδο    | Urkabuztaiz  | Zuia-Gorbeialdea | Dairy   | Negative | -         | - |
| 20-1004-5        | 2 | Female  | Holstein-Friesian | Oiarδο    | Urkabuztaiz  | Zuia-Gorbeialdea | Dairy   | Dubious  | Untypable | - |
| 20-1004-6        | 2 | Female  | Holstein-Friesian | Oiarδο    | Urkabuztaiz  | Zuia-Gorbeialdea | Dairy   | Dubious  | Untypable | - |
| 20-1004-11       | 2 | Female  | Holstein-Friesian | Oiarδο    | Urkabuztaiz  | Zuia-Gorbeialdea | Dairy   | Dubious  | Untypable | - |
| 20-1004-12       | 2 | Female  | Holstein-Friesian | Oiarδο    | Urkabuztaiz  | Zuia-Gorbeialdea | Dairy   | Negative | -         | - |
| 20-1004-13       | 2 | Female  | Holstein-Friesian | Oiarδο    | Urkabuztaiz  | Zuia-Gorbeialdea | Dairy   | Negative | -         | - |
| 20-1004-14       | 2 | Female  | Holstein-Friesian | Oiarδο    | Urkabuztaiz  | Zuia-Gorbeialdea | Dairy   | Negative | -         | - |
| 20-1004-15       | 2 | Female  | Holstein-Friesian | Oiarδο    | Urkabuztaiz  | Zuia-Gorbeialdea | Dairy   | Negative | -         | - |

|            |   |        |                   |           |             |                  |       |          |           |   |
|------------|---|--------|-------------------|-----------|-------------|------------------|-------|----------|-----------|---|
| 20-1004-16 | 2 | Female | Holstein-Friesian | Oiardo    | Urkabuztaiz | Zuia-Gorbeialdea | Dairy | Negative | -         | - |
| 20-1004-17 | 2 | Female | Holstein-Friesian | Oiardo    | Urkabuztaiz | Zuia-Gorbeialdea | Dairy | Negative | -         | - |
| 20-1004-18 | 2 | Female | Holstein-Friesian | Oiardo    | Urkabuztaiz | Zuia-Gorbeialdea | Dairy | Negative | -         | - |
| 20-1004-20 | 2 | Female | Holstein-Friesian | Oiardo    | Urkabuztaiz | Zuia-Gorbeialdea | Dairy | Negative | -         | - |
| 20-1004-22 | 2 | Female | Holstein-Friesian | Oiardo    | Urkabuztaiz | Zuia-Gorbeialdea | Dairy | Negative | -         | - |
| 20-1004-28 | 2 | Female | Holstein-Friesian | Oiardo    | Urkabuztaiz | Zuia-Gorbeialdea | Dairy | Negative | -         | - |
| 20-1004-31 | 2 | Female | Holstein-Friesian | Oiardo    | Urkabuztaiz | Zuia-Gorbeialdea | Dairy | Dubious  | Untypable | - |
| 20-1004-32 | 2 | Female | Holstein-Friesian | Oiardo    | Urkabuztaiz | Zuia-Gorbeialdea | Dairy | Dubious  | Untypable | - |
| 20-1004-33 | 2 | Female | Holstein-Friesian | Oiardo    | Urkabuztaiz | Zuia-Gorbeialdea | Dairy | Negative | -         | - |
| 20-1004-34 | 2 | Female | Holstein-Friesian | Oiardo    | Urkabuztaiz | Zuia-Gorbeialdea | Dairy | Negative | -         | - |
| 20-1004-35 | 2 | Female | Holstein-Friesian | Oiardo    | Urkabuztaiz | Zuia-Gorbeialdea | Dairy | Negative | -         | - |
| 20-1004-36 | 2 | Female | Holstein-Friesian | Oiardo    | Urkabuztaiz | Zuia-Gorbeialdea | Dairy | Negative | -         | - |
| 20-1004-37 | 2 | Female | Holstein-Friesian | Oiardo    | Urkabuztaiz | Zuia-Gorbeialdea | Dairy | Negative | -         | - |
| 20-1004-38 | 2 | Female | Holstein-Friesian | Oiardo    | Urkabuztaiz | Zuia-Gorbeialdea | Dairy | Dubious  | Untypable | - |
| 20-1004-41 | 2 | Female | Holstein-Friesian | Oiardo    | Urkabuztaiz | Zuia-Gorbeialdea | Dairy | Negative | -         | - |
| 20-1004-42 | 2 | Female | Holstein-Friesian | Oiardo    | Urkabuztaiz | Zuia-Gorbeialdea | Dairy | Negative | -         | - |
| 20-1004-45 | 2 | Female | Holstein-Friesian | Oiardo    | Urkabuztaiz | Zuia-Gorbeialdea | Dairy | Negative | -         | - |
| 20-1004-46 | 2 | Female | Holstein-Friesian | Oiardo    | Urkabuztaiz | Zuia-Gorbeialdea | Dairy | Negative | -         | - |
| 20-1004-47 | 2 | Female | Holstein-Friesian | Oiardo    | Urkabuztaiz | Zuia-Gorbeialdea | Dairy | Negative | -         | - |
| 20-1004-48 | 2 | Female | Holstein-Friesian | Oiardo    | Urkabuztaiz | Zuia-Gorbeialdea | Dairy | Negative | -         | - |
| 20-1004-49 | 2 | Female | Holstein-Friesian | Oiardo    | Urkabuztaiz | Zuia-Gorbeialdea | Dairy | Dubious  | Untypable | - |
| 20-1004-50 | 2 | Female | Holstein-Friesian | Oiardo    | Urkabuztaiz | Zuia-Gorbeialdea | Dairy | Negative | -         | - |
| 20-1004-51 | 2 | Female | Holstein-Friesian | Oiardo    | Urkabuztaiz | Zuia-Gorbeialdea | Dairy | Negative | -         | - |
| 20-1004-52 | 2 | Female | Holstein-Friesian | Oiardo    | Urkabuztaiz | Zuia-Gorbeialdea | Dairy | Negative | -         | - |
| 20-1004-53 | 2 | Female | Holstein-Friesian | Oiardo    | Urkabuztaiz | Zuia-Gorbeialdea | Dairy | Negative | -         | - |
| 20-1004-54 | 2 | Female | Holstein-Friesian | Oiardo    | Urkabuztaiz | Zuia-Gorbeialdea | Dairy | Negative | -         | - |
| 20-1004-55 | 2 | Female | Holstein-Friesian | Oiardo    | Urkabuztaiz | Zuia-Gorbeialdea | Dairy | Negative | -         | - |
| 20-1004-56 | 2 | Female | Holstein-Friesian | Oiardo    | Urkabuztaiz | Zuia-Gorbeialdea | Dairy | Negative | -         | - |
| 20-1004-57 | 2 | Female | Holstein-Friesian | Oiardo    | Urkabuztaiz | Zuia-Gorbeialdea | Dairy | Dubious  | Untypable | - |
| 20-1004-58 | 2 | Female | Holstein-Friesian | Oiardo    | Urkabuztaiz | Zuia-Gorbeialdea | Dairy | Negative | -         | - |
| 20-1004-59 | 2 | Female | Holstein-Friesian | Oiardo    | Urkabuztaiz | Zuia-Gorbeialdea | Dairy | Dubious  | Untypable | - |
| 20-1004-66 | 2 | Female | Holstein-Friesian | Oiardo    | Urkabuztaiz | Zuia-Gorbeialdea | Dairy | Positive | ST10      | - |
| 20-1109-1  | 2 | Female | Mixed breed       | Jugo-Zuia | Zuia        | Zuia-Gorbeialdea | Beef  | Negative | -         | - |
| 20-1110-2  | 2 | Female | Pirenaica         | Sojoguti  | Artziniega  | Ayala            | Beef  | Negative | -         | - |
| 20-1110-3  | 2 | Male   | Pirenaica         | Sojoguti  | Artziniega  | Ayala            | Beef  | Negative | -         | - |
| 20-1110-4  | 2 | Female | Pirenaica         | Sojoguti  | Artziniega  | Ayala            | Beef  | Negative | -         | - |
| 20-1110-5  | 2 | Female | Pirenaica         | Sojoguti  | Artziniega  | Ayala            | Beef  | Dubious  | Untypable | - |
| 20-1110-7  | 2 | Female | Pirenaica         | Sojoguti  | Artziniega  | Ayala            | Beef  | Negative | -         | - |
| 20-1112-1  | 2 | Female | Holstein-Friesian | Lezama    | Amurrio     | Ayala            | Dairy | Negative | -         | - |
| 20-1128-1  | 2 | Female | Holstein-Friesian | Oiardo    | Urkabuztaiz | Zuia-Gorbeialdea | Dairy | Negative | -         | - |
| 20-1128-3  | 2 | Female | Holstein-Friesian | Oiardo    | Urkabuztaiz | Zuia-Gorbeialdea | Dairy | Negative | -         | - |
| 20-1138-1  | 2 | Female | Pirenaica         | Larrimbe  | Amurrio     | Ayala            | Beef  | Negative | -         | - |
| 20-1138-2  | 2 | Female | Pirenaica         | Larrimbe  | Amurrio     | Ayala            | Beef  | Negative | -         | - |
| 20-954-1   | 2 | Female | Mixed breed       | Jugo      | Zuia        | Zuia-Gorbeialdea | Beef  | Dubious  | Untypable | - |
| 20-954-2   | 2 | Female | Mixed breed       | Jugo      | Zuia        | Zuia-Gorbeialdea | Beef  | Negative | -         | - |
| 20-954-3   | 2 | Female | Mixed breed       | Jugo      | Zuia        | Zuia-Gorbeialdea | Beef  | Negative | -         | - |
| 20-954-4   | 2 | Female | Mixed breed       | Jugo      | Zuia        | Zuia-Gorbeialdea | Beef  | Negative | -         | - |
| 20-990-1   | 2 | Female | Holstein-Friesian | Etxabarri | Kuartango   | Añana            | Dairy | Negative | -         | - |
| 20-990-2   | 2 | Female | Holstein-Friesian | Etxabarri | Kuartango   | Añana            | Dairy | Negative | -         | - |
| 20-1000-1  | 2 | Female | Holstein-Friesian | Sojo      | Ayala       | Ayala            | Dairy | Negative | -         | - |
| 20-1000-2  | 2 | Female | Holstein-Friesian | Sojo      | Ayala       | Ayala            | Dairy | Negative | -         | - |
| 20-1000-3  | 2 | Female | Holstein-Friesian | Sojo      | Ayala       | Ayala            | Dairy | Negative | -         | - |
| 20-1000-4  | 2 | Female | Holstein-Friesian | Sojo      | Ayala       | Ayala            | Dairy | Negative | -         | - |
| 20-1001-1  | 2 | Female | Holstein-Friesian | Costera   | Ayala       | Ayala            | Dairy | Negative | -         | - |
| 20-1002-1  | 2 | Female | Pirenaica         | Sojo      | Ayala       | Ayala            | Beef  | Dubious  | Untypable | - |
| 20-1002-2  | 2 | Female | Pirenaica         | Sojo      | Ayala       | Ayala            | Beef  | Negative | -         | - |
| 19-1895/19 | 2 | Female | Holstein-Friesian | Lukiano   | Zuia        | Zuia-Gorbeialdea | Dairy | Negative | -         | - |
| 19-1143/1  | 2 | Female | Pirenaica         | Sojo      | Ayala       | Ayala            | Beef  | Negative | -         | - |
| 19-1813/1  | 2 | Female | Mixed breed       | Jugo      | Zuia        | Zuia-Gorbeialdea | Beef  | Negative | -         | - |
| 19-1828/1  | 2 | Female | Mixed breed       | Guillarte | Kuartango   | Añana            | Beef  | Negative | -         | - |
| 19-1867/1  | 2 | Female | Pirenaica         | Oiardo    | Urkabuztaiz | Zuia-Gorbeialdea | Beef  | Negative | -         | - |
| 20-235/1   | 2 | Female | Pirenaica         | Oiardo    | Urkabuztaiz | Zuia-Gorbeialdea | Beef  | Negative | -         | - |
| 20-235/1   | 2 | Female | Pirenaica         | Oiardo    | Urkabuztaiz | Zuia-Gorbeialdea | Beef  | Negative | -         | - |
| 20-235/2   | 2 | Female | Pirenaica         | Oiardo    | Urkabuztaiz | Zuia-Gorbeialdea | Beef  | Negative | -         | - |
| 20-235/3   | 2 | Female | Pirenaica         | Oiardo    | Urkabuztaiz | Zuia-Gorbeialdea | Beef  | Negative | -         | - |
| 20-482/1   | 2 | Female | Holstein-Friesian | Oleta     | Aramaio     | Zuia-Gorbeialdea | Dairy | Negative | -         | - |
| 20-482/2   | 2 | Female | Holstein-Friesian | Oleta     | Aramaio     | Zuia-Gorbeialdea | Dairy | Dubious  | Untypable | - |
| 20-489/1   | 2 | Male   | Limousin          | Izoria    | Ayala       | Ayala            | Beef  | Negative | -         | - |
| 20-491/1   | 2 | Female | Mixed breed       | Aguñiga   | Ayala       | Ayala            | Beef  | Negative | -         | - |
| 20-492/2   | 2 | Female | Mixed breed       | Salmantón | Ayala       | Ayala            | Beef  | Negative | -         | - |
| 20-493/3   | 2 | Female | Limousin          | Beotegi   | Ayala       | Ayala            | Beef  | Negative | -         | - |
| 20-518/1   | 2 | Female | Mixed breed       | Salmantón | Ayala       | Ayala            | Beef  | Negative | -         | - |
| 20-527/1   | 2 | Female | Holstein-Friesian | Oleta     | Aramaio     | Zuia-Gorbeialdea | Dairy | Negative | -         | - |
| 20-527/2   | 2 | Female | Holstein-Friesian | Oleta     | Aramaio     | Zuia-Gorbeialdea | Dairy | Negative | -         | - |
| 20-538/2   | 2 | Female | Holstein-Friesian | Acosta    | Zigoitia    | Zuia-Gorbeialdea | Dairy | Dubious  | Untypable | - |
| 20-538/3   | 2 | Female | Holstein-Friesian | Acosta    | Zigoitia    | Zuia-Gorbeialdea | Dairy | Negative | -         | - |
| 20-538/4   | 2 | Female | Holstein-Friesian | Acosta    | Zigoitia    | Zuia-Gorbeialdea | Dairy | Negative | -         | - |
| 20-538/5   | 2 | Female | Holstein-Friesian | Acosta    | Zigoitia    | Zuia-Gorbeialdea | Dairy | Negative | -         | - |
| 20-538/6   | 2 | Female | Holstein-Friesian | Acosta    | Zigoitia    | Zuia-Gorbeialdea | Dairy | Negative | -         | - |
| 20-538/7   | 2 | Female | Holstein-Friesian | Acosta    | Zigoitia    | Zuia-Gorbeialdea | Dairy | Negative | -         | - |
| 20-538/8   | 2 | Female | Holstein-Friesian | Acosta    | Zigoitia    | Zuia-Gorbeialdea | Dairy | Negative | -         | - |
| 20-538/9   | 2 | Female | Holstein-Friesian | Acosta    | Zigoitia    | Zuia-Gorbeialdea | Dairy | Negative | -         | - |
| 20-538/10  | 2 | Female | Holstein-Friesian | Acosta    | Zigoitia    | Zuia-Gorbeialdea | Dairy | Negative | -         | - |

[illegible]

[illegible]



[illegible]
